# Supplementary material for: Dual embryonic origin of the mammalian otic vesicle forming the inner ear
Source: Oxford University Press journal article supplement (doi:10.1242/dev.069849), 2011-11-22
Supplement: dev069849tables1.pdf [file dev069849tables1.pdf]

**Table S1. Primers for genotyping**

| Genotype                      | Primer         | Sequence (5' to 3')       |
|-------------------------------|----------------|---------------------------|
| <i>Pax3</i> <sup>Cre/+</sup>  | oIMR6977common | CTGCACTCAAGGGACTCCTC      |
|                               | oIMR6978wtRev  | GTGAAGGCGAGACGAAAAAG      |
|                               | oIMR9074mutRev | AGGCAAATTTTGGTGTACGG      |
| <i>Wnt1-lacZ</i>              | LacZ-Fwd       | ATCCTCTGCATGGTCAGGTC      |
|                               | LacZ-Rev       | CGTGGCCTGATTCATTCC        |
| <i>Hoxb1</i> <sup>Cre/+</sup> | EBCreFwd       | CAATGCTGTTTCACTGGTTATG    |
|                               | EBCreRev       | CATTGCCCTGTTTCACTATC      |
| <i>RCE:LoxP</i>               | RCE-Rosa1      | CCCAAAGTCGCTCTGAGTTGTTATC |
|                               | RCE-Rosa2      | GAAGGAGCGGGAGAAATGGATATG  |
|                               | RCE-Cag3       | CCAGGCGGGCCATTTACCGTAAG   |
